# Supplementary material
Source: publisher figshare collection journal article supplement (https://acs.figshare.com/ndownloader/files/3738031)
Supplement: Supplementary file 1 [file 3738031]

# Supporting Information

## Enhancing the Directed Self-assembly Kinetics of Block Copolymers Using Binary Solvent Mixtures

Woon Ik Park<sup>1†</sup>, Young Joong Choi<sup>2†</sup>, Je Moon Yun<sup>1</sup>, Suck Won Hong<sup>3</sup>, Yeon Sik Jung<sup>4</sup>, and Kwang Ho Kim<sup>1,2\*</sup>

<sup>1</sup>Global Frontier R&D Center for Hybrid Interface Materials (HIM), Busandaehak-ro 63beon-gil, Geumjeong-gu, Busan 609-735, Republic of Korea

<sup>2</sup>School of Materials Science and Engineering, Pusan National University (PNU), Busandaehak-ro 63beon-gil, Geumjeong-gu, Busan 609-735, Republic of Korea

<sup>3</sup>Department of Cogno-Mechatronics Engineering, Pusan National University (PNU), Busandaehak-ro 63beon-gil, Geumjeong-gu, Busan 609-735, Republic of Korea

<sup>4</sup>Department of Materials Science and Engineering, Korea Advanced Institute of Science and Technology (KAIST) 291 Daehak-ro, Yuseong-gu, Daejeon 305-701, Republic of Korea

<sup>†</sup>These authors contributed equally to this work.

---

\* Corresponding authors, Email: [kwhokim@pusan.ac.kr](mailto:kwhokim@pusan.ac.kr) (K.H.K.), TEL: +82-51-510-3391

**a**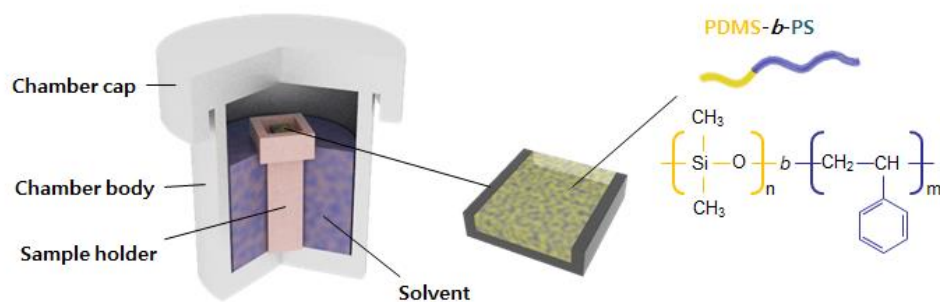**b**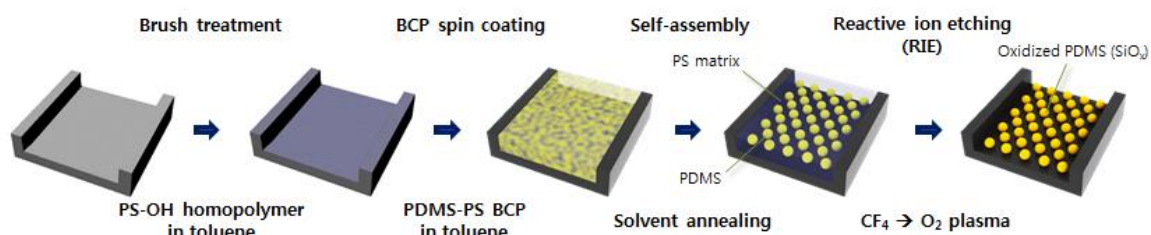

**Figure S1. Schematic for an experimental setup of solvent vapor annealing and process sequence for directed self-assembly of BCP via solvent annealing.** (a) Experimental setup for solvent vapor annealing of BCP thin film in the chamber filled with solvent. (b) Process sequence for DSA of BCP using solvent annealing.

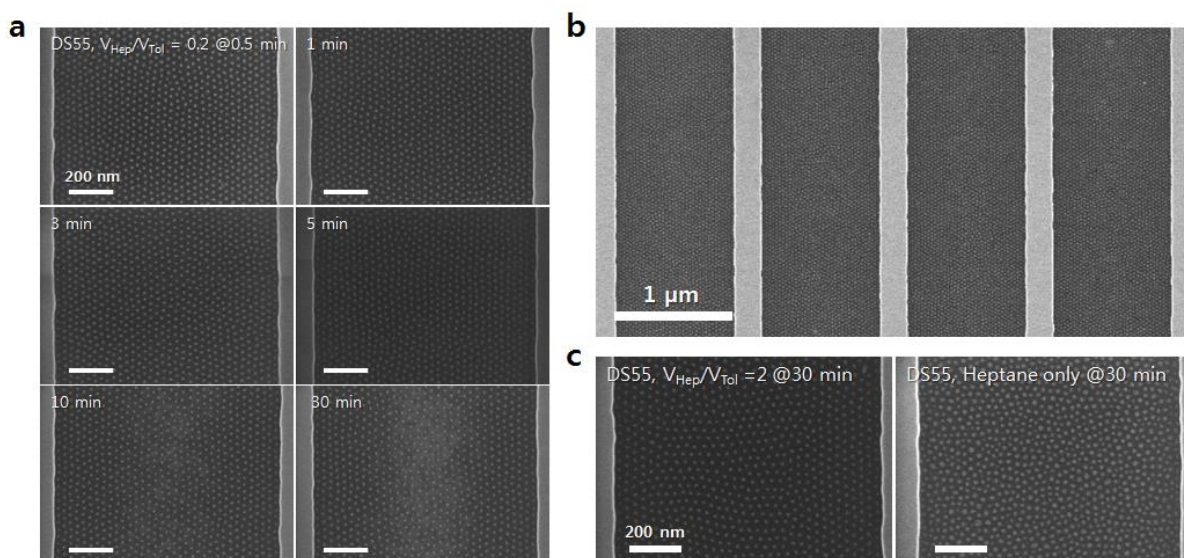

**Figure S2. Self-assembled morphologies of DS55 thin film.** (a) Time-evolution of DS55 morphologies at  $V_{\text{Hep}}/V_{\text{Tol}} = 0.2$ , showing well-organized dot patterns in 1 minute. (b) SEM image of self-assembled dot pattern formed over the large area. (c) Poorly ordered dot patterns at  $V_{\text{Hep}}/V_{\text{Tol}} = 2.0$  (left) and pure heptane (right) after long annealing time (30 min). In spite of the long annealing time, excessive addition of heptane to toluene did not produce well-ordered BCP pattern.

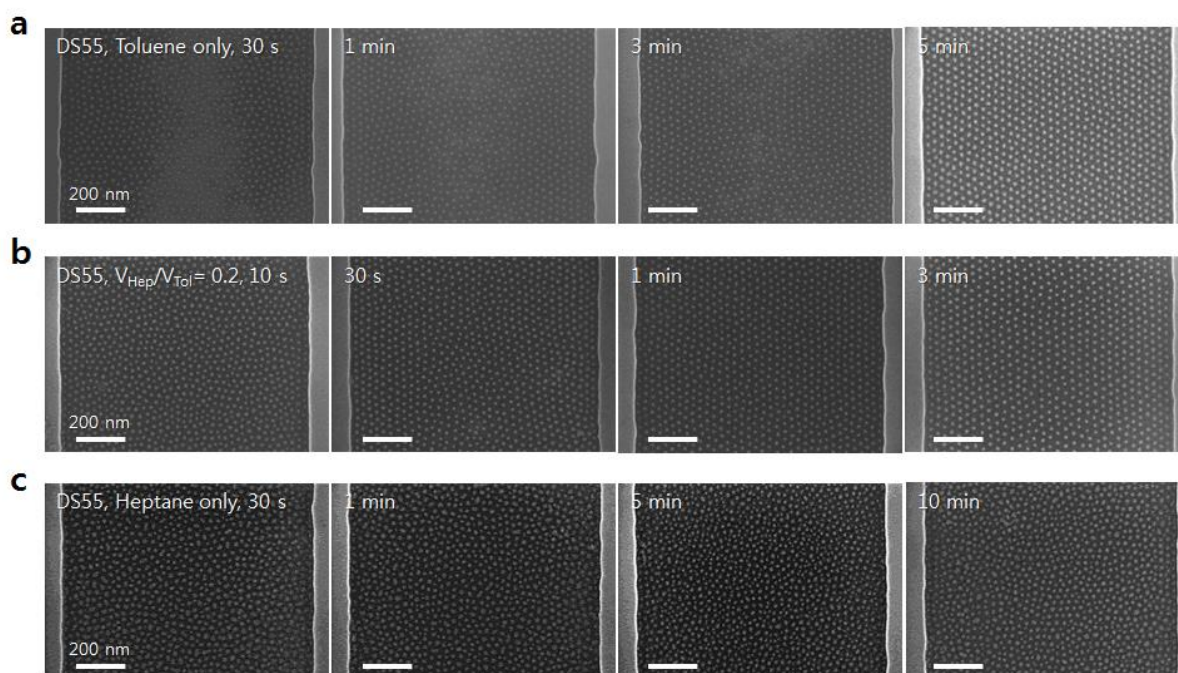

**Figure S3. Time-evolution of DS55 BCP morphology.** Self-assembled dot pattern annealed at (a) pure toluene for 30 sec, 1min, 3 min, and 5 min, (b)  $V_{\text{Hep}}/V_{\text{Tol}} = 0.2$  for 10 sec, 30 sec, 1 min, and 3 min, and (c) pure heptane for 30 sec, 1 min, 5 min, and 10 min. A binary solvent of heptane and toluene enables more rapid microphase separation of BCP compared to pure toluene and pure heptane.

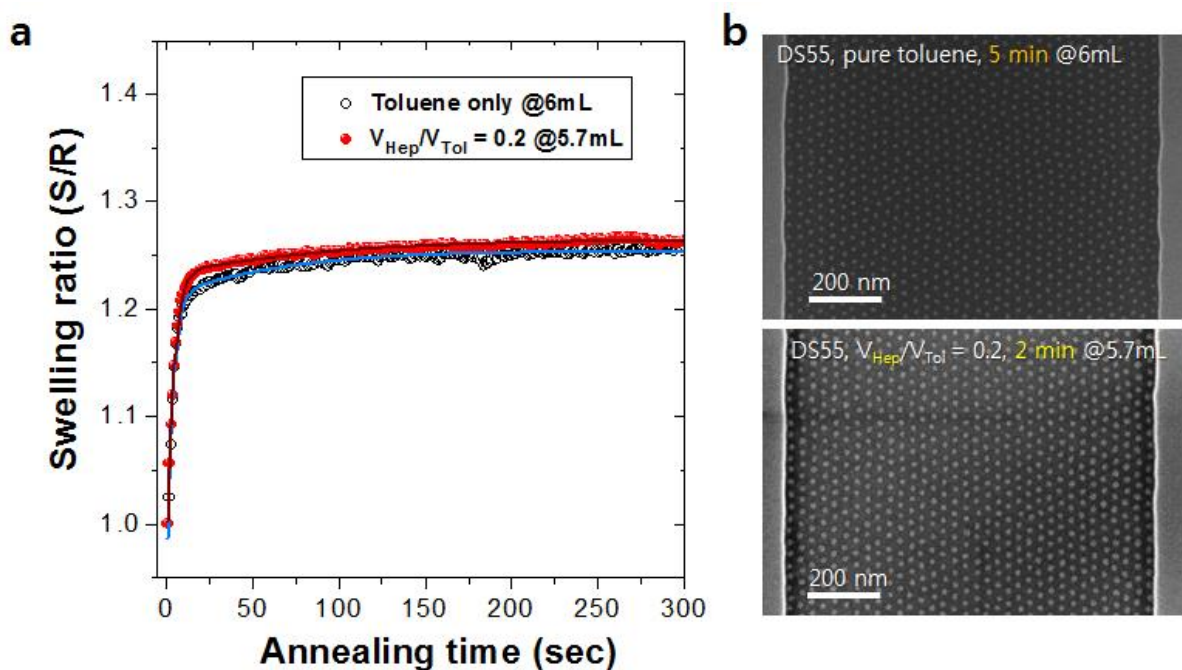

**Figure S4. Comparison of SRs for a DS55 BCP thin film annealed at pure toluene and binary solvent.** (a) SR curves of DS55 annealed at pure toluene (6 mL) and  $V_{\text{Hep}}/V_{\text{Tol}} = 0.2$  (5.7 mL), showing a similar SR-value. (b) SEM image of well-ordered dot pattern of DS55 annealed at  $V_{\text{Hep}}/V_{\text{Tol}} = 0.2$  (5.7 mL) for 2 min. A binary solvent induces faster self-assembly speed than pure toluene (5 min).

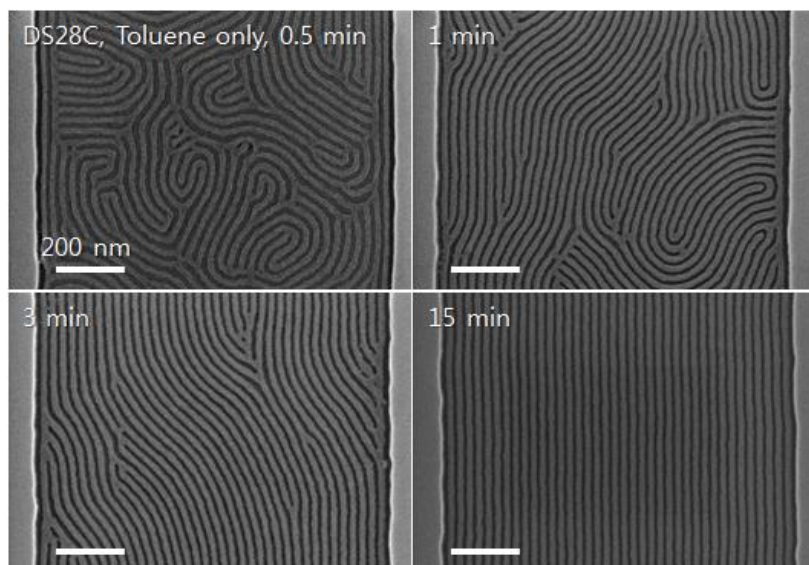

**Figure S5. Time-evolution of cylinder-forming DS28C morphology annealed with pure toluene.** Well-ordered line pattern was obtained in 15 minutes.



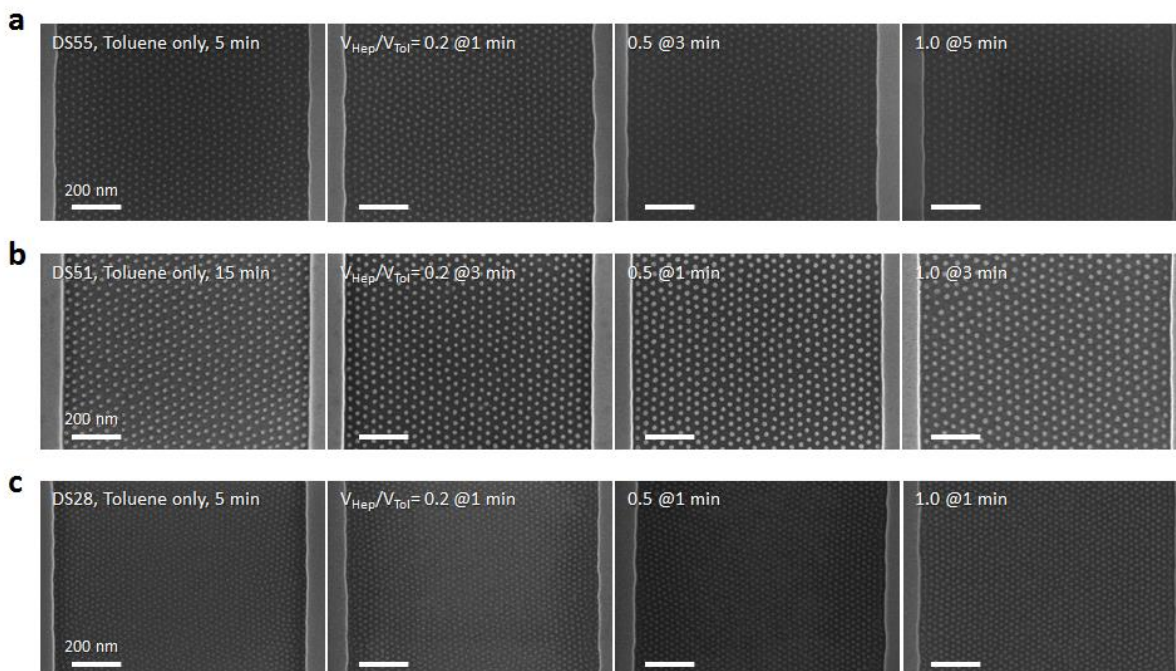

**Figure S6. Well-ordered dot patterns of various PDMS-*b*-PS BCPs under the optimum conditions of the toluene and the heptane/toluene mixture.** (a-c) Self-assembled morphologies of (a) DS55, (b) DS51, and (c) DS28. SEM images in left column are well-ordered BCP morphologies annealed with pure toluene. Other morphologies are obtained under the optimum annealing conditions (each  $V_{\text{Hep}}/V_{\text{Tol}}$  ratios and annealing time), showing highly ordered dot patterns.

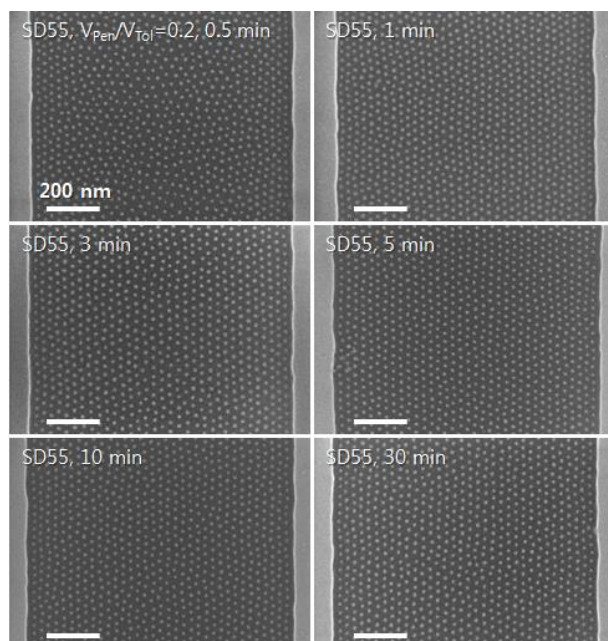

**Figure S7. Time-evolution of DS55 morphology annealed when  $V_{\text{Pen}}/V_{\text{Tol}} = 0.2$ .** The DS55 BCP was annealed for 0.5 – 30 min, showing well-ordered dot pattern after 1 minute.



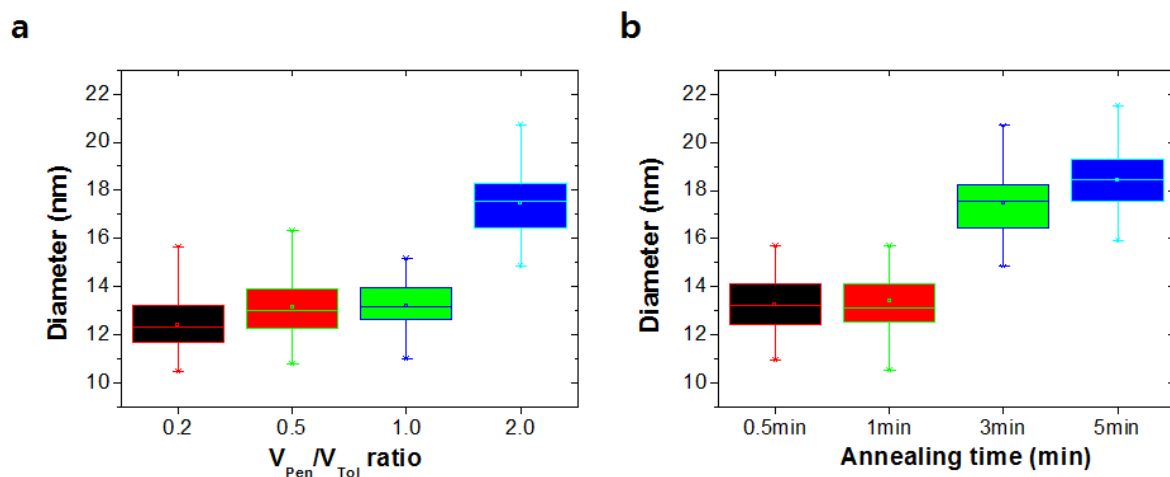

**Figure S8. Dot size distribution of DS55 at varied  $V_{Pen}/V_{Tol}$  ratio, and annealing time at a fixed  $V_{Pen}/V_{Tol}$  ratio of 2.0. Graphs for distribution of diameter vs. (a)  $V_{Pen}/V_{Tol}$  and (b) annealing time when  $V_{Pen}/V_{Tol} = 2.0$ .**
